# Supplementary material for: The transmembrane domain of N –acetylglucosaminyltransferase I is the key determinant for its Golgi subcompartmentation
Source: PubMed Central journal article supplement (PMC4282539; doi:10.1111/tpj.12671), 2014-09-17
Supplement: tpj0080-0809-SD1.pdf [file tpj0080-0809-SD1.pdf]

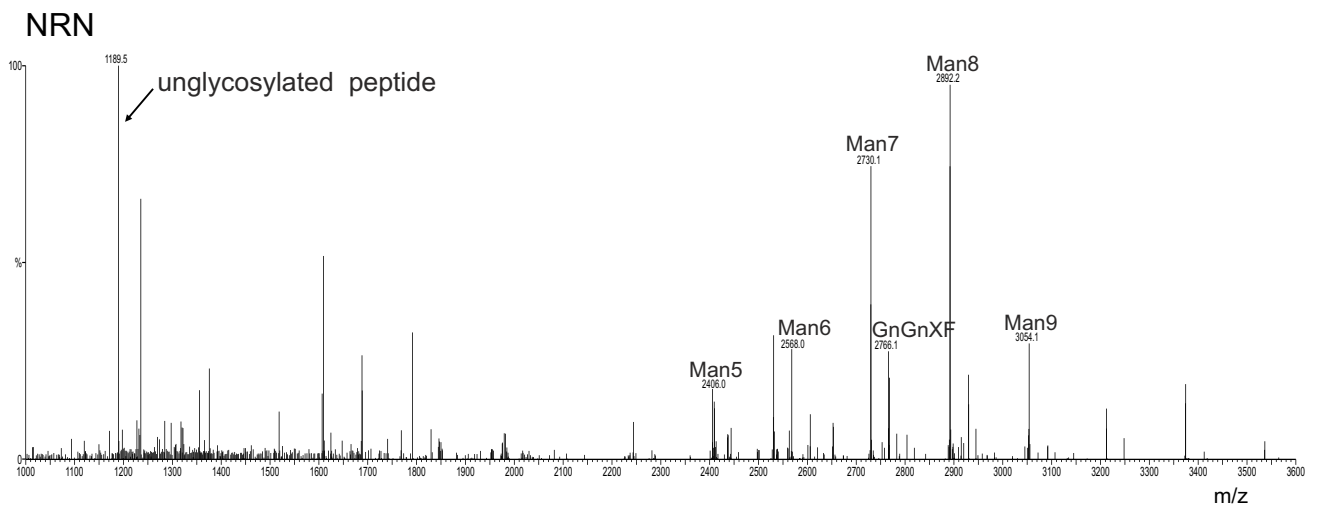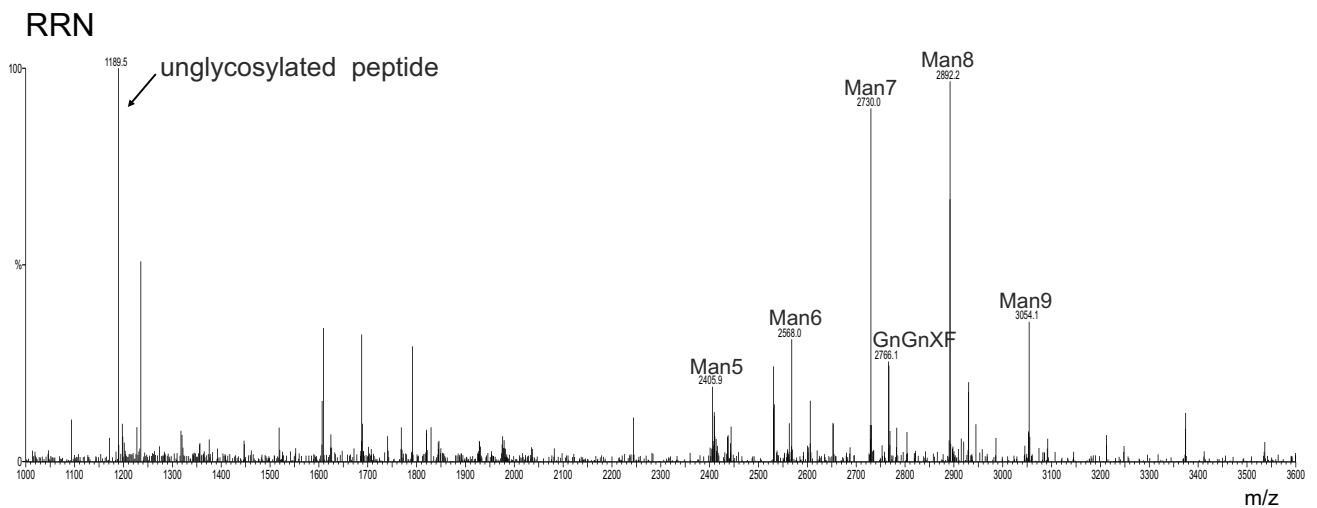

**Figure S1:** LC-ESI-MS spectra of NRN and RRN glycoprotein fusion proteins display also the unglycosylated peptide.

Mass spectra of glycopeptide 1 (EEQYNSTYR) derived from the glycoprotein part of GFP<sub>glyc</sub> are shown. Man5 (Man<sub>5</sub>GlcNAc<sub>2</sub>) to Man9 (Man<sub>9</sub>GlcNAc<sub>2</sub>), oligomannosidic N-glycans, indicative of ER retention; GnGnXF (GlcNAc<sub>2</sub>XylFucMan<sub>3</sub>GlcNAc<sub>2</sub>) complex N-glycan, processed in the Golgi apparatus. The peak corresponding to the unglycosylated peptide is indicated.
