# Supplementary material for: The transmembrane domain of N –acetylglucosaminyltransferase I is the key determinant for its Golgi subcompartmentation
Source: PubMed Central journal article supplement (PMC4282539; doi:10.1111/tpj.12671), 2014-09-17
Supplement: tpj0080-0809-SD2.pdf [file tpj0080-0809-SD2.pdf]

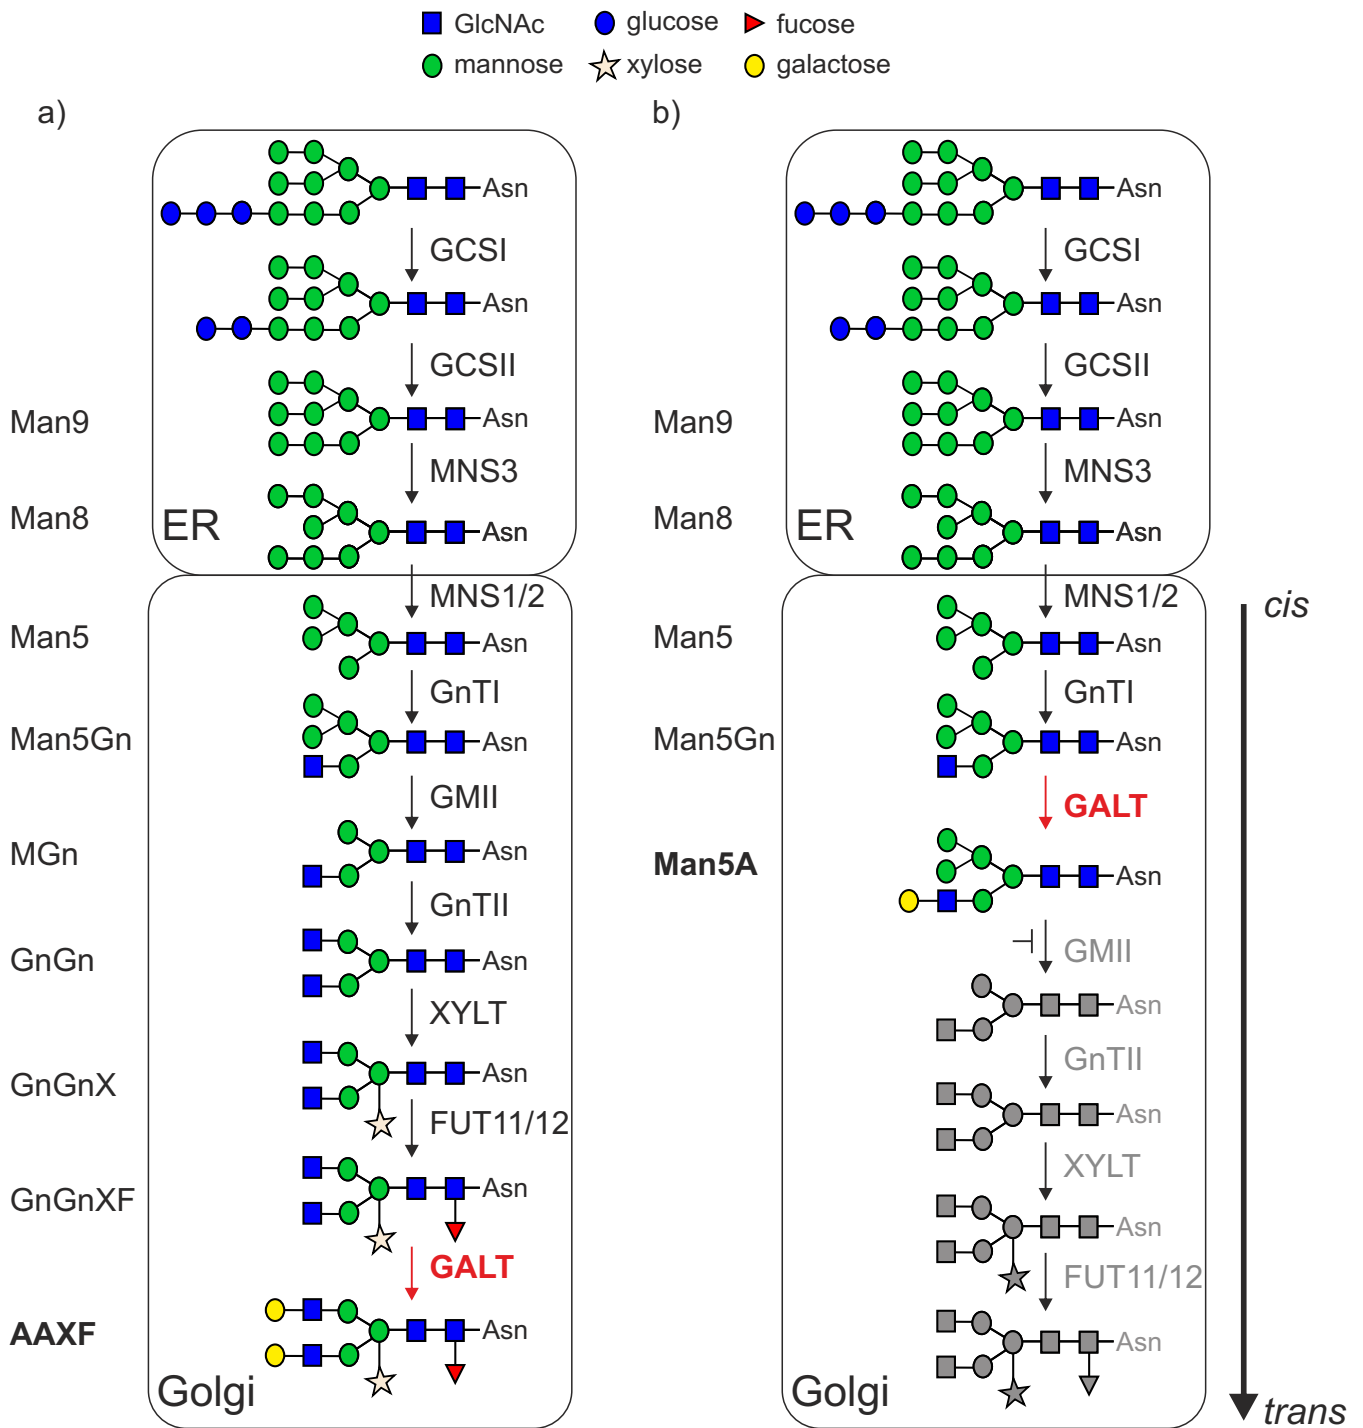

**Figure S2:** Schematic presentation of the N-glycan processing pathway and the inhibition of processing by GALT action at different sites within the Golgi.

N-glycan processing enzymes: GCSI:  $\alpha$ -glucosidase I; GCSII:  $\alpha$ -glucosidase II; MNS3: ER- $\alpha$ -mannosidase I; MNS1/2: Golgi- $\alpha$ -mannosidase I; GnTI: N-acetylglucosaminyltransferase I; GMII: Golgi- $\alpha$ -mannosidase II; GnTII: N-acetylglucosaminyltransferase II; XYLT:  $\beta$ 1,2-xylosyltransferase; FUT11/FUT12: core  $\alpha$ 1,3-fucosyltransferase; GALT: human  $\beta$ 1,4-galactosyltransferase.

a) GALT is targeted to the *trans*-Golgi (e.g. by fusion to RRR) and adds terminal galactose residues to the fully processed complex N-glycan GnGXF resulting in the formation of AAXF structures.

b) GALT is targeted to the *cis*/medial-Golgi (e.g. by fusion to NNN) and adds a single galactose residue to hybrid (Man5Gn) or other incompletely processed N-glycans. The presence of galactose (Man5A) inhibits N-glycan processing enzymes acting downstream of GnTI (structures depicted in grey).
