# Supplementary material for: The transmembrane domain of N –acetylglucosaminyltransferase I is the key determinant for its Golgi subcompartmentation
Source: PubMed Central journal article supplement (PMC4282539; doi:10.1111/tpj.12671), 2014-09-17
Supplement: tpj0080-0809-SD3.pdf [file tpj0080-0809-SD3.pdf]

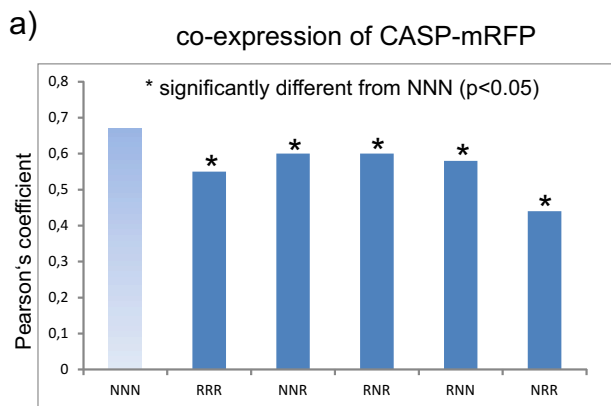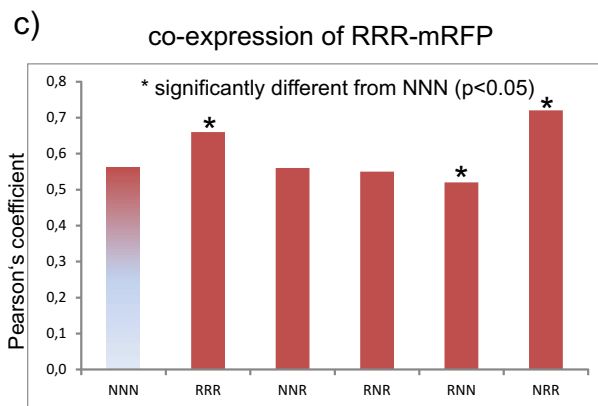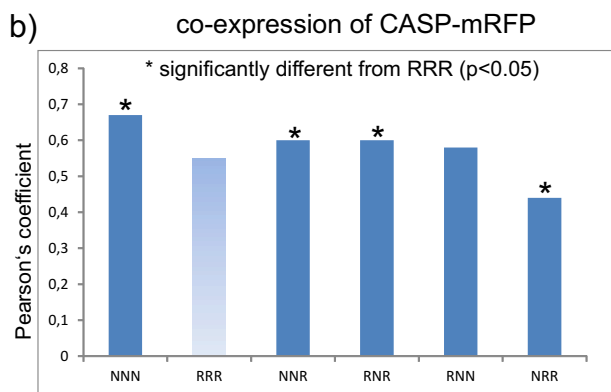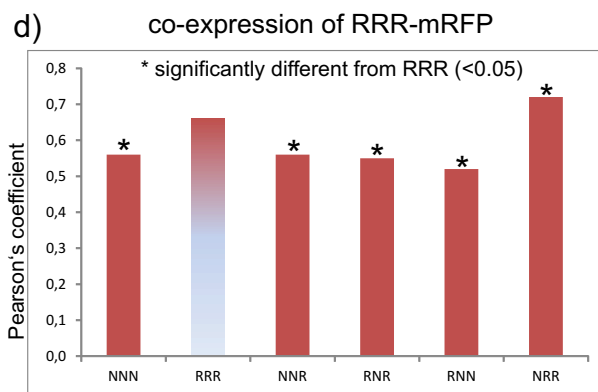

e)

| Pearson's r | coexpression with CASP-RFP |    |      |      |
|-------------|----------------------------|----|------|------|
|             | CTS                        | n  | Mean | SD   |
|             | NNN                        | 38 | 0,67 | 0,06 |
|             | RRR                        | 29 | 0,55 | 0,08 |
|             | NNR                        | 37 | 0,60 | 0,08 |
|             | RNR                        | 34 | 0,60 | 0,06 |
|             | RNN                        | 34 | 0,58 | 0,07 |
|             | NRR                        | 36 | 0,44 | 0,11 |

n: number of confocal images used for quantification, each image contained 5-10 Golgi bodies

f)

| Pearson's r | coexpression with RRR-mRFP |    |      |      |
|-------------|----------------------------|----|------|------|
|             | CTS                        | n  | Mean | SD   |
|             | NNN                        | 38 | 0,56 | 0,07 |
|             | RRR                        | 28 | 0,66 | 0,10 |
|             | NNR                        | 30 | 0,56 | 0,04 |
|             | RNR                        | 33 | 0,55 | 0,08 |
|             | RNN                        | 31 | 0,52 | 0,05 |
|             | NRR                        | 34 | 0,72 | 0,06 |

n: number of confocal images used for quantification, each image contained 5-10 Golgi bodies

**Figure S3:** Statistical analyses of co-localization data.

a) to d) Histograms of Pearson's correlation coefficient (r) (as shown in Figure 5b). Significant differences are marked by asterisks ( $p < 0.05$ ; two tailed t-Test: two-sample assuming equal variances).

a) Co-localization of NNN-GFP with CASP-mRFP, co-localization of RRR-GFP with CASP-mRFP, co-localization of chimeric GFPs with CASP-mRFP. NNN-GFP (*cis*/medial) co-expressed with CASP-mRFP (*cis*/medial) is reference value for calculation of p-values.

b) Same as in a) but RRR-GFP (*trans*) co-expressed with CASP-mRFP (*cis*/medial) is reference value for calculation of p-values.

c) Co-localization of NNN-GFP with RRR-mRFP, co-localization of RRR-GFP with RRR-mRFP, co-localization of chimeric GFPs with RRR-mRFP. NNN-GFP (*cis*/medial) co-expressed with RRR-mRFP (*trans*) is reference value for calculation of p-values.

d) Same as in c) but RRR-GFP (*trans*) co-expressed with RRR-mRFP (*trans*) is reference value for calculation of p-values.

e) Table with number of individual image counts, mean values and standard deviations (SD) for Pearson's coefficients (as shown in Figure 5b and Figure S3a and b).

f) Table with number of individual image counts, mean values and standard deviations (SD) for Pearson's coefficients (as shown in Figure 5b and Figure S3c and d).
