# Supplementary material for: The transmembrane domain of N –acetylglucosaminyltransferase I is the key determinant for its Golgi subcompartmentation
Source: PubMed Central journal article supplement (PMC4282539; doi:10.1111/tpj.12671), 2014-09-17
Supplement: tpj0080-0809-SD4.pdf [file tpj0080-0809-SD4.pdf]

**Table S1.** List of all used primers

---

|            |                                        |
|------------|----------------------------------------|
| RSTC_1F    | CTAGAATGATTCATACCAACTTGAAGAAAAAGTAC    |
| RSTC_2R    | TTTTTCTTCAAGTTGGTATGAATCATT            |
| GALT18F    | TATAGGATCCGCCATCGGGCAGTCCT             |
| GALT19R    | TATACTCGAGCTAGCTCGGTGTCCCGATGTCC       |
| AthGnT_12F | TAAGCTTCTGGCCGGTGGAGGTATTTT            |
| AthGnT_13R | CCTCGCCATATCTAGAACAACAACCAGATCAAAACCG  |
| AthGnT_14F | TTGTTCTAGATATGGCGAGGATCTCGTGTGAC       |
| AthGnT_16R | CGTCGGATCCCTGGCGGTTCTTCATATCTTCG       |
| AthGnT_15F | GAACCGCCAGGGATCCGACGAAGAACTTGTGCAGCTTA |
| AthGnT_9R  | TATAAGATCTGGAATTTTCGAATTCCAAGCTGC      |
| NtGnTI_19F | TATAGGATCCGACCAGGAGTGCCGACAGTTAAGGG    |
| NtGnTI_31R | TATAAGATCTAGTATCTTCATTTCCGAGTTGTT      |
